# Supplementary material
Source: HighWire-hosted journal article supplement (https://thorax.bmj.com/content/77/7/669)

Figure S2

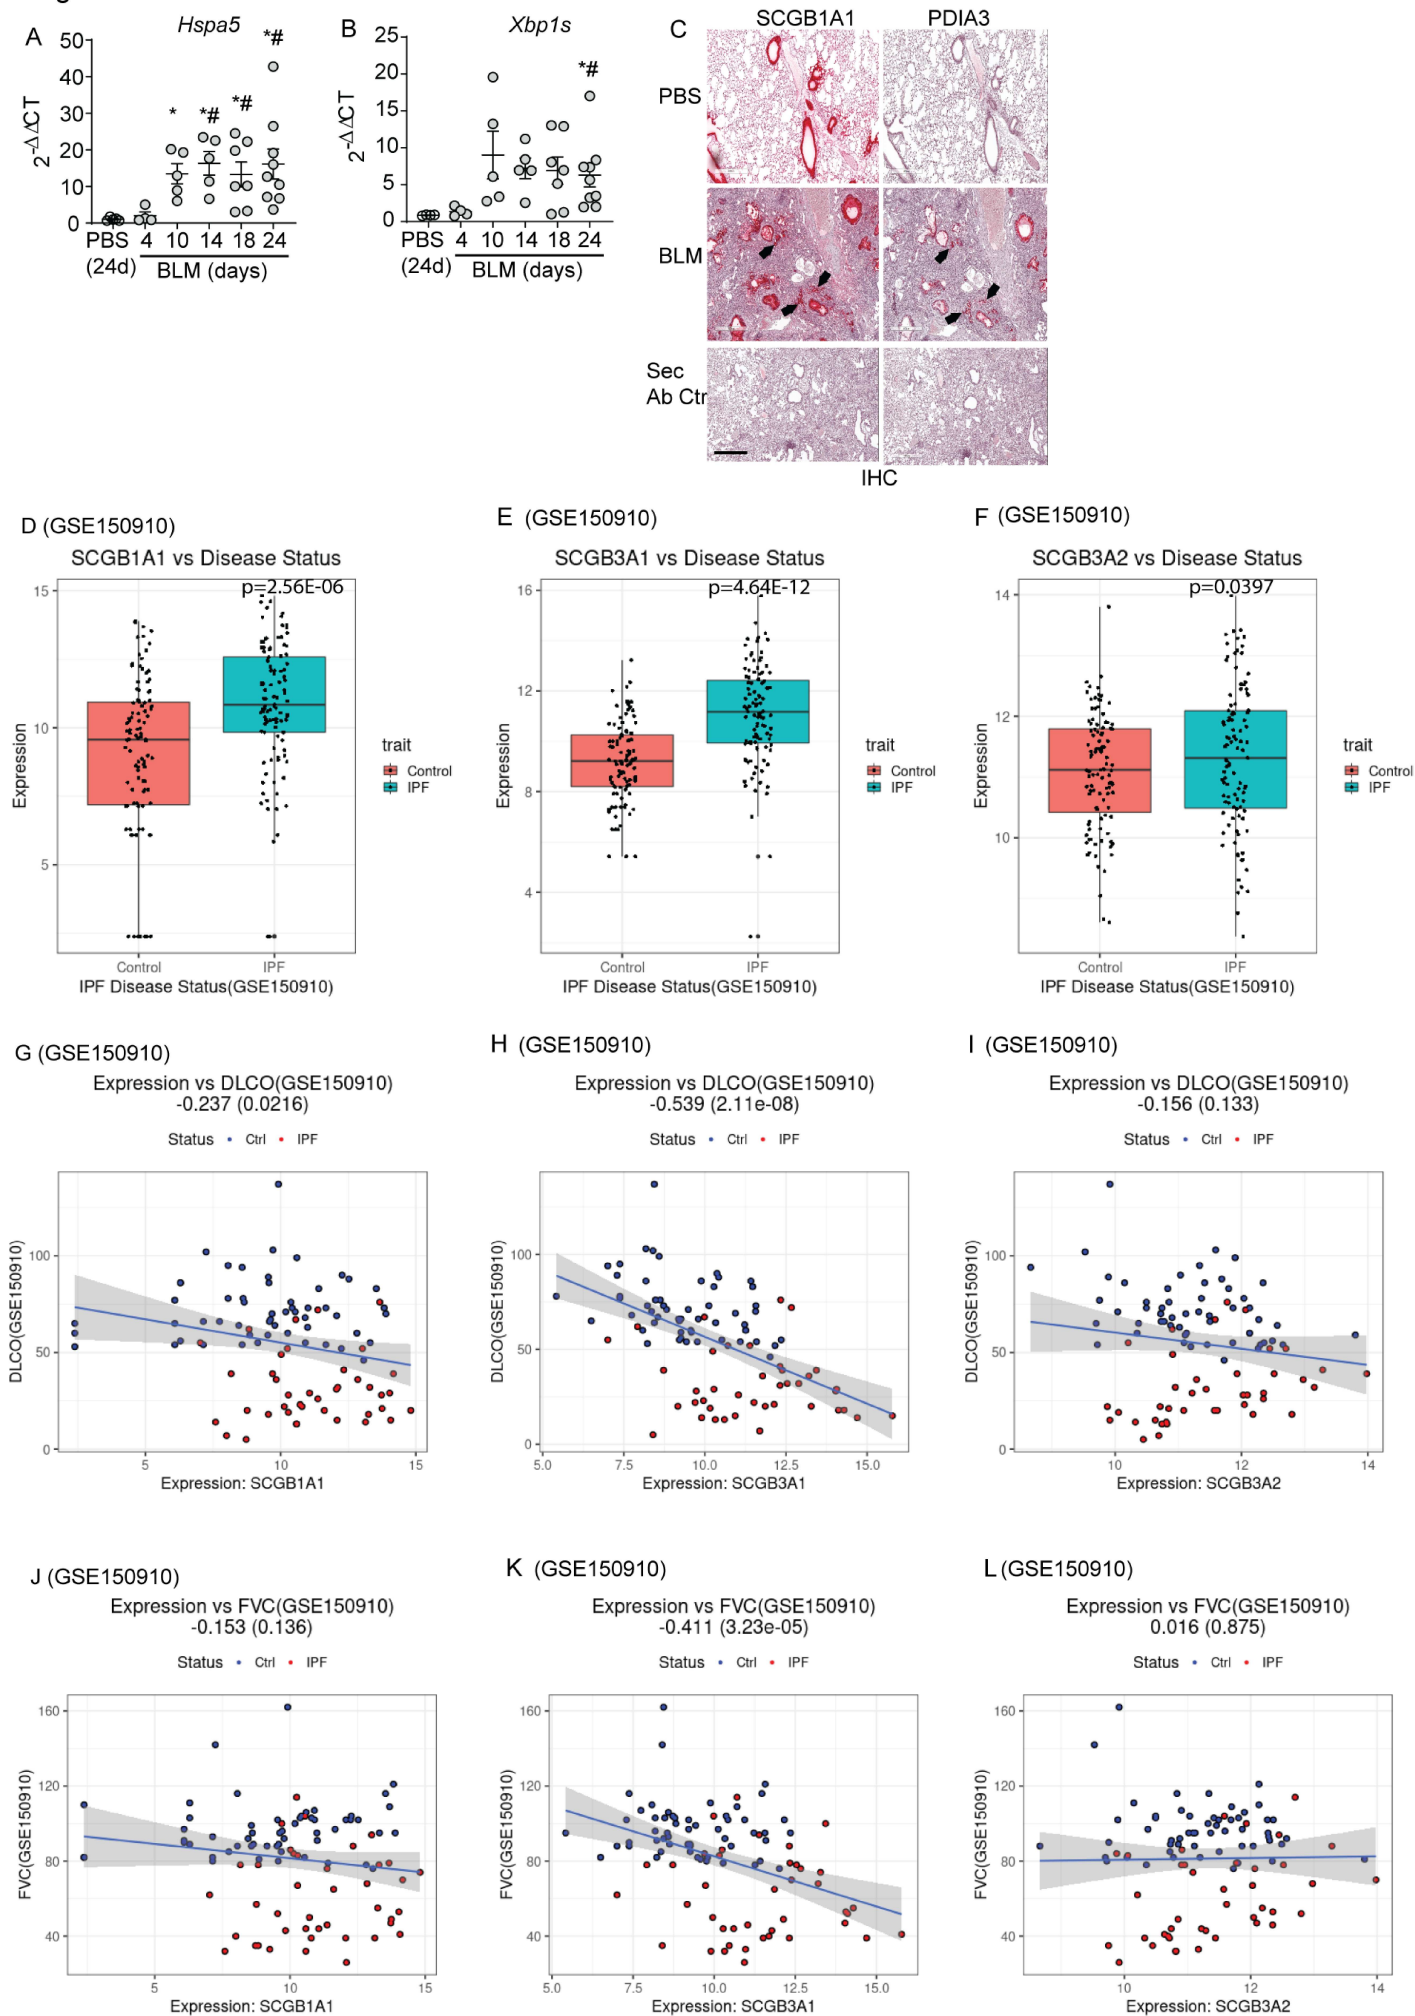

Supplement: inline-supplementary-material-5 [file inline-supplementary-material-5.pdf]

Figure S3

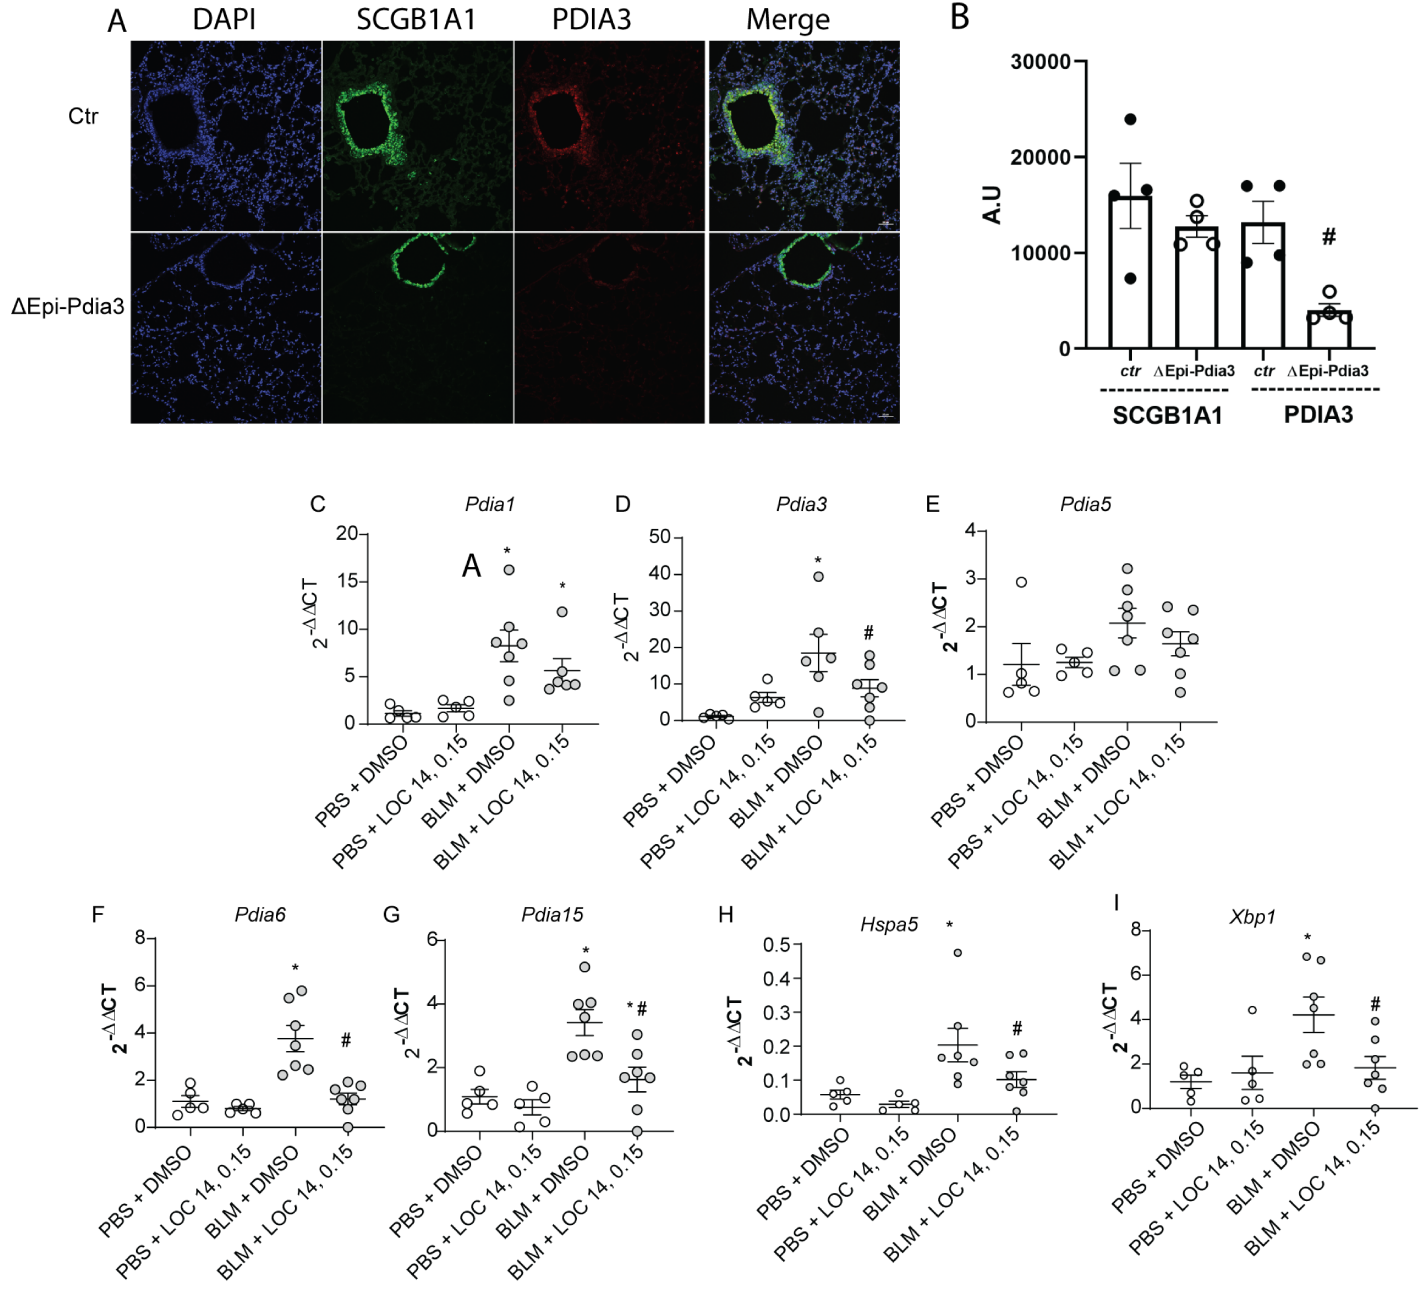

Supplement: inline-supplementary-material-7 [file inline-supplementary-material-7.pdf]

Figure S4

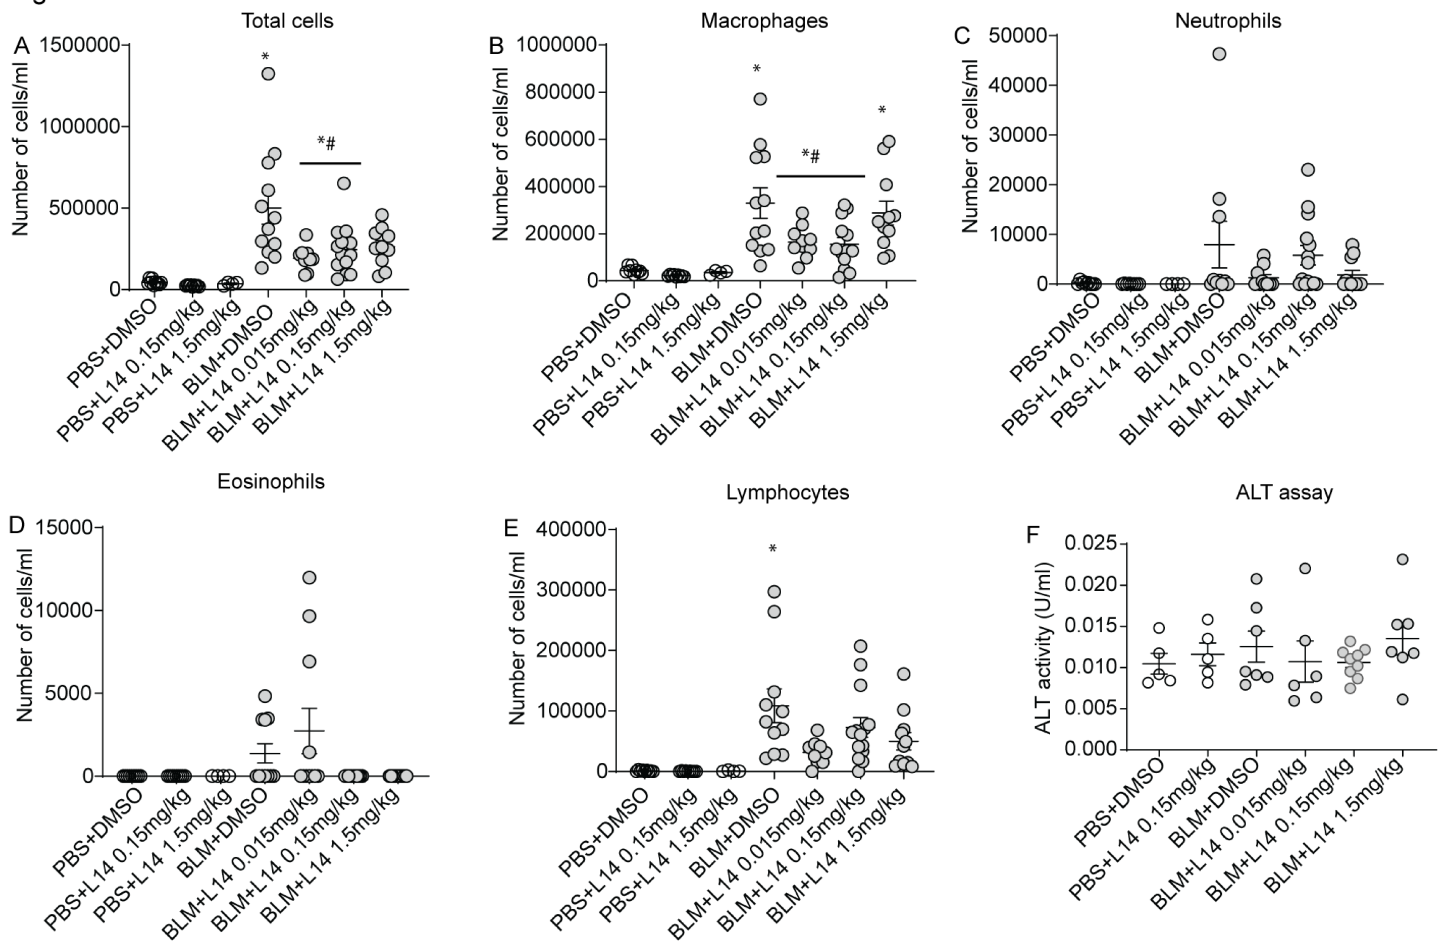

Supplement: inline-supplementary-material-8 [file inline-supplementary-material-8.pdf]
